# Supplementary material for: B-Cell Activating Factor Enhances Hepatocyte-Driven Angiogenesis via B-Cell CLL/Lymphoma 10/Nuclear Factor-KappaB Signaling during Liver Regeneration
Source: MDPI journal article supplement (doi:10.3390/ijms20205022), 2019-10-10

Supplementary data

supplementary material: The entire western blots **Figure 1B** with marker

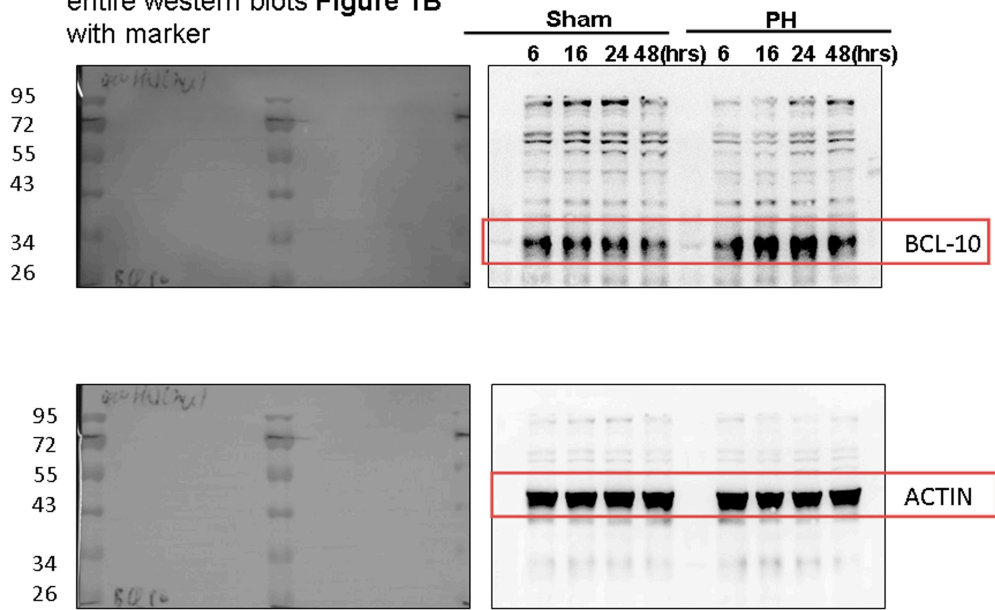

supplementary material: The entire western blots (**Figure 2C**) with marker

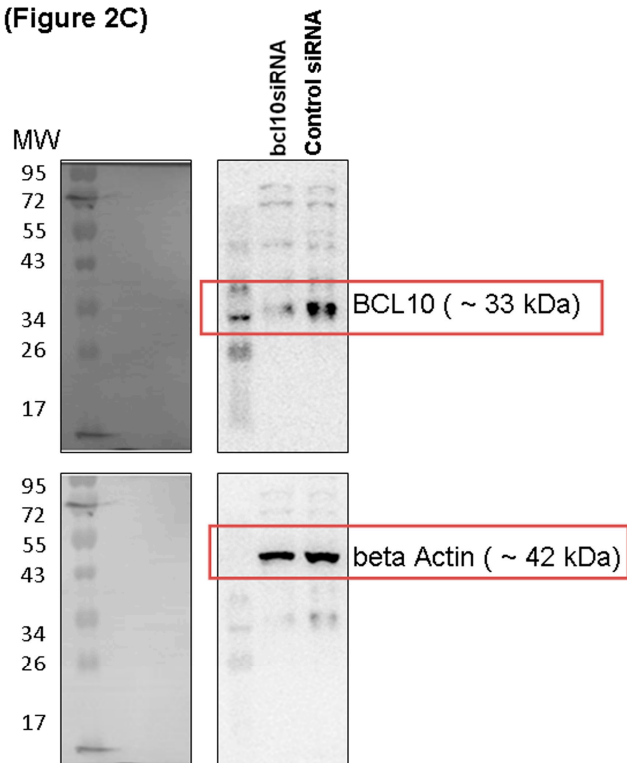

Supplement: s1 [file s1]
